# Supplementary material
Source: PubMed Central journal article supplement (PMC4434689)
Supplement: pnas.201506111SI.pdf [file pnas.201506111SI.pdf]

# Supporting Information

Alibabaei et al. 10.1073/pnas.1506111112

## SI Text

### Experimental

**Fabrication of Photoelectrodes.** The SnO<sub>2</sub> colloidal paste used to prepare electrodes in this study was prepared using a protocol similar to that found in the literature (1). In brief, 1 mL acetic acid was added to 30 mL of 15 wt % SnO<sub>2</sub> colloidal dispersion in water (Alfa Aesar) and the mixture was stirred overnight at room temperature. This solution underwent hydrothermal treatment using a Parr Instruments pressure vessel at 240 °C for 60 h. The resulting solution was then sonicated and 2.5 wt % of both polyethylene oxide (mol wt 100,000) and polyethylene glycol (mol wt 12,000) was added. Stirring for 12 h yielded a homogeneous colloidal paste. Transparent thin-film electrodes were prepared by depositing the sol-gel paste onto conductive FTO glass substrates 4 cm × 2.2 cm using the doctor blade method with tape casting and sintered at 450 °C for 30 min under air.

**Atomic Layer Deposition.** Atomic layer deposition (ALD) was performed in a commercial reactor (Savannah S200, Cambridge Nanotech). Titanium dioxide (TiO<sub>2</sub>) was deposited using Tetraakis(dimethylamido)titanium, Ti(NMe<sub>2</sub>)<sub>4</sub> (TDMAT, 99.999%, Sigma-Aldrich), and water. The reactor temperature was 130 °C. The TDMAT reservoir was kept at 75 °C. The TDMAT was pulsed into the reactor for 0.3 s and then held for 10 s before opening the pump valve and purging for 10 s. ALD coating conditions were 130 °C and 20 torr of N<sub>2</sub> carrier gas with a sequence of 0.3-s metal precursor dose, 10-s hold, 20-s N<sub>2</sub> purge, 0.02-s H<sub>2</sub>O dose, 10-s hold, 20-s N<sub>2</sub> purge.

The aluminum oxide (Al<sub>2</sub>O<sub>3</sub>) was deposited using trimethylaluminum, Al(CH<sub>3</sub>)<sub>3</sub> (TMA, 97%, Sigma-Aldrich) The reactor temperature was 130 °C. The TMA reservoir was kept at room temperature. The TMA was pulsed into the reactor for 0.015 s and then held for 10 s before opening the pump valve and purging for 10 s. ALD coating conditions were 130 °C and 20 torr of N<sub>2</sub> carrier gas with a sequence of 0.15-s metal precursor dose, 10-s hold, 20-s N<sub>2</sub> purge, 0.015-s H<sub>2</sub>O dose, 10-s hold, 20-s N<sub>2</sub>

purge. The growth rate under these conditions was 0.6 Å per cycles for TiO<sub>2</sub> and 1.1 Å per cycles for Al<sub>2</sub>O<sub>3</sub>, as determined by ellipsometry on Si wafers. The quality of the TiO<sub>2</sub> outer layers has been confirmed by TEM (Fig. 1B).

**Photocurrent Measurements.** The mesoporous films consisting of SnO<sub>2</sub> nanoparticles (diameter of each individual particle ~10–20 nm) after ALD processing were annealed at 450 °C for 30 min. The assembly was surface-bound to the nanoparticle films by immersing them in assembly solutions 10<sup>-3</sup>–10<sup>-4</sup> M in 0.1 M HNO<sub>3</sub> for ~16 h. The overlayers of Al<sub>2</sub>O<sub>3</sub> or TiO<sub>2</sub> were deposited by ALD and the slides were used without further annealing.

The fully assembled dye-sensitized photoelectrochemical cell (DSPEC) consisted of a FTO|SnO<sub>2</sub>-TiO<sub>2</sub>-[Ru<sup>II</sup><sub>a</sub>-Ru<sup>II</sup><sub>b</sub>-OH<sub>2</sub>]<sup>4+</sup> core/shell photoanode, Pt wire cathode, and a Ag/AgCl reference electrode. Current–time (i–t) measurements were recorded with an applied bias vs. Ag/AgCl and the samples were illuminated with 445-nm light (20 nm FWHM) in both pH 4.6, 0.5 M LiClO<sub>4</sub>, 20 mM acetate/acetic acid buffer, and 0.1 M phosphate buffer at pH 7 with NaClO<sub>4</sub> supporting electrolyte added to give an ionic strength of 0.5 M. The photocurrent at different intensities of 445 nm (FWHM 20 nm) illumination from 15 to 86 mW cm<sup>2</sup> was recorded.

**Hydrogen and Oxygen Evolution.** A custom-built, two-compartment Pyrex cell was used for the electrochemical detection of hydrogen and oxygen. In this approach, the Pt counterelectrode and photoanode compartments were separated by a Nafion sheet. The working electrode consisted of a FTO|SnO<sub>2</sub>/TiO<sub>2</sub> (6.6 nm)-[Ru<sup>II</sup><sub>a</sub>-Ru<sup>II</sup><sub>b</sub>-OH<sub>2</sub>]<sup>4+</sup> electrode. This electrode was prepared with 100 ALD cycles of TiO<sub>2</sub> to form the core/shell layer as described previously and loaded with the surface-bound assembly **1**, and the adsorbed assembly was stabilized on the surface by an additional 10 ALD cycles of Al<sub>2</sub>O<sub>3</sub>. The setup used for detection of photogenerated oxygen by the chromophore–catalyst assembly **1** is shown in Fig. S3. The photoelectrochemical cell was argon-degassed for 30 min before photolysis.

1. Chappel S, Zaban A (2002) Nanoporous SnO<sub>2</sub> electrodes for dye-sensitized solar cells: Improved cell performance by the synthesis of 18 nm SnO<sub>2</sub> colloids. *Sol Energy Mater Sol Cells* 71:141–152.

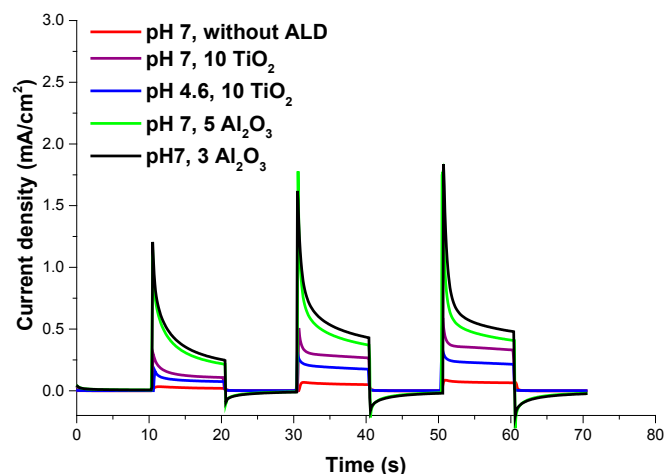

Fig. S1. Photocurrent comparisons for a FTO|SnO<sub>2</sub>/TiO<sub>2</sub>(6.6nm)-[Ru<sup>II</sup>-Ru<sup>III</sup>-OH<sub>2</sub>]<sup>4+</sup> photoanode in pH 4.6 acetate (20 mM) and pH 7 phosphate (0.1 M) buffers illustrating the effect of ALD overlayers of TiO<sub>2</sub> and Al<sub>2</sub>O<sub>3</sub>.

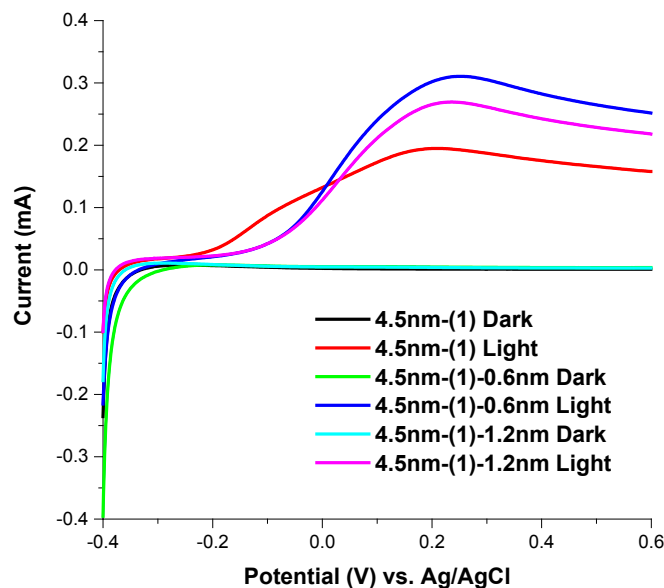

Fig. S2. Linear voltammetry measurements in pH 4.6, 0.5 M LiClO<sub>4</sub>, 20 mM acetic acid/acetate buffer recorded with a FTO|SnO<sub>2</sub>/TiO<sub>2</sub>(4.5 nm)-[Ru<sup>II</sup>-Ru<sup>III</sup>-OH<sub>2</sub>]<sup>4+</sup> photoanode with no ALD overlayer (red), 10 cycles of TiO<sub>2</sub> ALD overlayer (blue), and 20 cycles of TiO<sub>2</sub> ALD (pink). Traces in light taken under continuous illumination at 445 nm (10 mW/cm<sup>2</sup>, FWHM 20 nm).

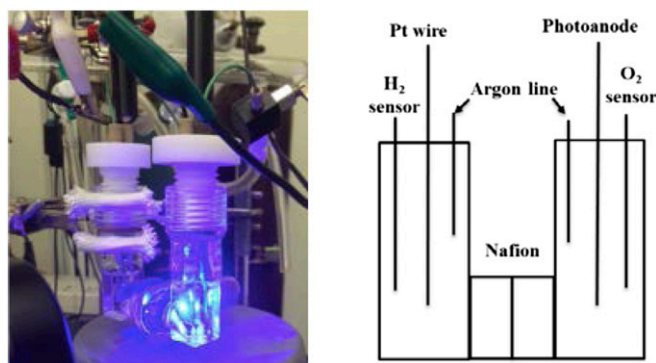

Fig. S3. Picture and schematic of the home-built DSPEC device.

**Table S1. Comparisons between SnO<sub>2</sub> and nanoITO as cores with 50-cycle ALD TiO<sub>2</sub> shells (3.3 nm) derivatized with 1 with a Pt counterelectrode at a 200-mV vs. NHE (0 V vs. Ag/AgCl) bias at pH 4.6 in 0.5 M LiClO<sub>4</sub> with 20 mM acetate/acetic acid buffer**

| Light intensity at 445 nm (mW cm <sup>-2</sup> ) | nanoITO/TiO <sub>2</sub> (3.3 nm)-[Ru <sup>II</sup> -Ru <sup>II</sup> -OH <sub>2</sub> ] <sup>4+</sup> | SnO <sub>2</sub> /TiO <sub>2</sub> (3.3 nm)-[Ru <sup>II</sup> -Ru <sup>II</sup> -OH <sub>2</sub> ] <sup>4+</sup> | SnO <sub>2</sub> /TiO <sub>2</sub> (3.3 nm)-[Ru <sup>II</sup> -Ru <sup>II</sup> -OH <sub>2</sub> ] <sup>4+</sup> -(0.6 nm) TiO <sub>2</sub> |
|--------------------------------------------------|--------------------------------------------------------------------------------------------------------|------------------------------------------------------------------------------------------------------------------|---------------------------------------------------------------------------------------------------------------------------------------------|
| 15.1                                             | 0.10                                                                                                   | 0.48                                                                                                             | 0.79                                                                                                                                        |
| 55.6                                             | 0.12                                                                                                   | 0.54                                                                                                             | 0.78                                                                                                                                        |
| 86.0                                             | 0.12                                                                                                   | 0.59                                                                                                             | 0.85                                                                                                                                        |

The photocurrent densities in the table are reported in mA cm<sup>-2</sup>.

**Table S2. Comparisons between initial and after 10-s photocurrent densities value SnO<sub>2</sub> and nanoITO as cores with 50-cycle ALD TiO<sub>2</sub> shells (3.3 nm) derivatized with 1 with a Pt counterelectrode at a 200-mV vs. NHE bias at pH 4.6 in 0.5 M LiClO<sub>4</sub> with 20 mM acetate/acetic acid buffer, measured at light intensity 10% of 455 nm, 15.1 mW cm<sup>-2</sup>**

| Time       | nanoITO/TiO <sub>2</sub> (3.3 nm)-[Ru <sup>II</sup> -Ru <sup>II</sup> -OH <sub>2</sub> ] <sup>4+</sup> | SnO <sub>2</sub> /TiO <sub>2</sub> (3.3 nm)-[Ru <sup>II</sup> -Ru <sup>II</sup> -OH <sub>2</sub> ] <sup>4+</sup> | SnO <sub>2</sub> /TiO <sub>2</sub> (3.3 nm)-[Ru <sup>II</sup> -Ru <sup>II</sup> -OH <sub>2</sub> ] <sup>4+</sup> -(0.6 nm) TiO <sub>2</sub> |
|------------|--------------------------------------------------------------------------------------------------------|------------------------------------------------------------------------------------------------------------------|---------------------------------------------------------------------------------------------------------------------------------------------|
| 0          | 0.10                                                                                                   | 0.48                                                                                                             | 0.79                                                                                                                                        |
| After 10 s | 0.02                                                                                                   | 0.10                                                                                                             | 0.15                                                                                                                                        |

**Table S3. Illustrating the role of variations in ALD overlayers on photocurrent densities for FTO|SnO<sub>2</sub>/TiO<sub>2</sub>(6.6 nm)-[Ru<sup>II</sup>-Ru<sup>II</sup>-OH<sub>2</sub>]<sup>4+</sup> as a function of incident light intensity and pH**

| Light intensity, 445 nm (mW cm <sup>-2</sup> ) | pH 7*        |                                         |                                         |                          | pH 4.6 <sup>†</sup>      |
|------------------------------------------------|--------------|-----------------------------------------|-----------------------------------------|--------------------------|--------------------------|
|                                                | No overlayer | +0.55 nm Al <sub>2</sub> O <sub>3</sub> | +0.33 nm Al <sub>2</sub> O <sub>3</sub> | +0.6 nm TiO <sub>2</sub> | +0.6 nm TiO <sub>2</sub> |
| 15.1                                           | 0.02         | 1.14                                    | 1.21                                    | 0.29                     | 0.16                     |
| 55.6                                           | 0.02         | 1.35                                    | 1.62                                    | 0.51                     | 0.31                     |
| 86.0                                           | 0.04         | 1.77                                    | 1.83                                    | 0.59                     | 0.37                     |

\*0.1 M PO<sub>4</sub> buffer with the ionic strength increased to 0.5 M with NaClO<sub>4</sub>.

<sup>†</sup>0.5 M LiClO<sub>4</sub> 20 mM in acetic acid/acetate buffer (HAc/OAc<sup>-</sup>).
